# Supplementary material
Source: PubMed Central journal article supplement (PMC2981481)

### **Additional patient information**

Cytogenetic analyses of diagnostic samples were performed by Cancer and Leukemia Group B (CALGB)-approved institutional cytogenetic laboratories as part of the cytogenetic companion study 8461 and confirmed by central karyotype review.<sup>1,2</sup> To establish cytogenetically normal acute myeloid leukemia (CN-AML),  $\geq 20$  metaphase cells from diagnostic marrow had to be analyzed and the karyotype found to be normal.<sup>2</sup> Patients were treated on one of the following CALGB frontline treatment protocols: 9720,<sup>3</sup> 9420,<sup>4</sup> 8525,<sup>5</sup> 8923<sup>6</sup> and 10201.<sup>7</sup> CALGB 9720 was initiated as a phase III trial in untreated AML patients aged 60 years or older evaluating multidrug resistance (MDR) modulation by valspodar (PSC-833) during induction and consolidation therapy with cytarabine, daunorubicin, and etoposide, and subcutaneous low-dose recombinant interleukin-2 (rIL-2), a regimen previously piloted in older AML patients in CALGB 9420<sup>4</sup> as maintenance therapy. The valspodar (PSC-833)-containing induction and consolidation arm was closed after random assignment of 120 patients because of excessive early deaths.<sup>3</sup> CALGB 9720 continued as a phase III study of rIL-2 maintenance therapy, with all patients receiving cytarabine, daunorubicin, and etoposide chemotherapy, without PSC-833. Notably, patients assigned to the rIL-2 immunotherapy regimen had disease-free survival (DFS) and overall survival (OS) similar to those of patients assigned to no further therapy demonstrating lack of beneficial effects of rIL-2.<sup>8</sup> CALGB 8525<sup>5,9</sup> evaluated three dose schedules of cytarabine (high dose, 3g/m<sup>2</sup>; intermediate dose, 400mg/m<sup>2</sup> and low dose, 100mg/m<sup>2</sup>) as consolidation treatment for AML patients in first complete remission (CR) and demonstrated a dose-dependent improvement in survival in the core-binding factor and CN-AML cytogenetic subgroups. CALGB 8923 evaluated a regimen of modified high-dose cytarabine plus mitoxantrone compared with a standard lower dose cytarabine scheme; the former failed to show a benefit compared to the latter.<sup>6</sup> CALGB 10201 evaluated the BCL-2 antisense, Oblimersen (Genesense; G3139) administered with induction and consolidation chemotherapy and found no difference in outcome relative to chemotherapy alone.<sup>7</sup> Per protocols, patients enrolled on these studies did not receive allogeneic stem cell transplantation in first CR. Patients enrolled on the treatment protocols were also enrolled on the companion protocols CALGB 9665 (Leukemia Tissue Bank) and CALGB 20202 (molecular studies in AML), and gave informed consent for pretreatment marrow and blood collection and their research use in accordance with the Declaration of Helsinki.

### **Definition of clinical end points**

CR was defined as recovery of an absolute neutrophil count  $\geq 1,500/\mu\text{L}$ , platelet count  $\geq 100,000/\mu\text{L}$ , no leukemic blasts in the blood, marrow cellularity  $>20\%$  with maturation of all cell lines, no Auer rods,  $<5\%$  marrow blast cells, and no evidence of extramedullary leukemia, all of which had persisted for at least 1 month.<sup>10</sup> Relapse was defined by  $\geq 5\%$  marrow blasts, circulating leukemic blasts, or the development of extramedullary leukemia. OS was measured from the date on study until the date of death, and patients alive at last follow-up were censored. DFS was measured from the date of CR until the date of relapse or death; patients alive and relapse-free at last follow-up were censored. For cumulative incidence of relapse (CIR), time was calculated from date of CR until relapse. Patients alive without relapse were censored. Because in the studied patient group, there were no remission deaths, similar information was attained when DFS or CIR were considered as endpoints (see Figures 1 and S1).

## Statistical analyses

Differences for baseline demographic, clinical, and molecular features in patients according to *FLT3*-ITD status were assessed using the Fisher's exact and Wilcoxon rank sum tests for categorical and continuous variables, respectively. CR rates were compared using the Fisher's exact test. Estimated probabilities of OS and DFS were calculated using the Kaplan-Meier method, and the log-rank test evaluated differences between survival distributions. To control for multiple comparisons for the allelic ratio survival analyses, we used the Sidak adjustment.<sup>11</sup> Multivariable proportional hazards models were constructed for OS and DFS to evaluate the impact of *FLT3*-ITD. For the analyses including all 219 patients, factors considered for inclusion in these models were *FLT3*-ITD, *NPM1*, *WT1* and *CEBPA* mutational status, hemoglobin level, platelet count, white blood count (WBC), percentage of blood and bone marrow (BM) blasts, age, race, and sex. Protocol effect (i.e. a categorical variable with five levels, one for each protocol) was evaluated in univariable analyses for outcome, and was not significant in any of the models (CR:  $P=.85$ ; DFS:  $P=.76$ ; OS:  $P=.86$ ). In addition, we also tested whether adding protocol effect to the models evaluating the impact of *FLT3*-ITD on outcome, modified any of the results. Our analyses showed that protocol effect remained insignificant and the effect of *FLT3*-ITD on outcome stayed the same. Thus protocol effect was not included in multivariable modeling. For the subset analyses in the 60-69 year-old patients, factors considered for inclusion in the models were *FLT3*-ITD, *NPM1* and *CEBPA* mutational status, hemoglobin level, platelet count, WBC, percentage of blood and BM blasts, age, race, and sex. Of the above factors, those significant at  $\alpha=.20$  from univariable analyses were used in a limited backwards selection procedure to build multivariable models. Variables remaining in the final models were significant at  $\alpha=.05$ . The proportional hazards assumption was checked for each variable individually. If the proportional hazards assumption was not met for a particular variable, then an artificial time dependent covariate was included in all models that contained that variable.<sup>12</sup> For survival end points, hazard ratios with their corresponding 95% confidence intervals were obtained for each significant prognostic factor.

## Microarray data analyses

Microarray gene and microRNA expression analyses were performed using BRB-ArrayTools version 3.4.0 (R. Simon and A.P. Lam, National Cancer Institute, Bethesda, MD) and using R version 2.3.1 (R Foundation for Statistical Computing, Vienna, Austria).

For gene-expression microarrays, summary measures of gene expression were computed for each probe set using the robust multichip average (RMA) method, which incorporates quantile normalization of arrays.<sup>13</sup> Expression values were logged (base 2) before analysis. A filtering step was performed to remove probe sets that did not display significant variation in expression across arrays. In this procedure, a chi-square test was used to test whether the observed variance in expression of a probe set was significantly larger than the median observed variance in expression for all probe sets using  $\alpha=.01$  as the significance level. A total of 24,437 probe sets passed the filtering criterion. A gene-expression signature was derived by comparing available microarray profiles from *FLT3*-ITD (n=38) versus *FLT3* wild-type (*FLT3*-WT; n=79) patients. Univariable significance levels of  $\alpha=.001$  for gene-expression profiling were used to determine the probe-sets that comprised the signature.

For microRNA microarrays, the signal intensity was calculated for each spot making an adjustment for local background. Intensities were log-transformed and log-intensities from replicate spots were averaged. Quantile normalization was performed on arrays using all human and mouse microRNA probes represented on the array.<sup>14</sup> For each microRNA probe, an adjustment was made for batch effects (ie, differences in expression related to the batch in which arrays were hybridized). Further analysis was limited to the 895 unique human probes represented on the array. A comparison between available patient samples with (n=40) and without (n=80) *FLT3*-ITD was performed, using a univariable significance level of  $\alpha=.005$ .

We used GenMAPP version 2.1 and MAPPFinder version 2.0 to assess which biological processes (as designated by the Gene Ontology project at [www.geneontology.org](http://www.geneontology.org)) were overrepresented among the genes comprising the *FLT3*-ITD signature. An overrepresented biological process is one with more associated genes (also referred to as members) in the gene-expression signature than expected by chance. In our analysis, we only considered biological processes that were represented by at least five members among the genes that could be analyzed in our microarray-expression database. MAPPFinder uses a permutation procedure to determine overrepresented biological processes. An alpha level of .005 was used for identifying such biological processes. Furthermore, we only report the overrepresented biological processes for which at least half of their members (ie, genes) analyzed in our microarray-expression database were identified as part of the *FLT3*-ITD signature.

To test for an interaction between age group (60-69 vs  $\geq 70$  years) and *FLT3*-ITD mutation status for each probe-set and microRNA probe studied, an ANOVA model was fitted with expression of the probe-set or microRNA probe as the response variable and age group, *FLT3*-ITD mutation status, and age group by *FLT3*-ITD mutation status interaction as explanatory variables in the model. Global tests were then performed based on a permutation procedure to determine if the number of probe-sets or microRNA probes with a significant interaction effect ( $P$ -value  $<.001$  for probe-sets,  $P$ -value  $<.005$  for microRNA probes) was greater than expected by chance.

All statistical analyses were performed by the CALGB Statistical Center.

## REFERENCES

1. Byrd JC, Mrózek K, Dodge RK, et al. Pretreatment cytogenetic abnormalities are predictive of induction success, cumulative incidence of relapse, and overall survival in adult patients with de novo acute myeloid leukemia: results from Cancer and Leukemia Group B (CALGB 8461). *Blood*. 2002;100(13):4325-4336.
2. Mrózek K, Carroll AJ, Maharry K, et al. Central review of cytogenetics is necessary for cooperative group correlative and clinical studies of adult acute leukemia: the Cancer and Leukemia Group B experience. *Int J Oncol*. 2008;33(2):239-244.
3. Baer MR, George SL, Dodge RK, et al. Phase 3 study of the multidrug resistance modulator PSC-833 in previously untreated patients 60 years of age and older with acute myeloid leukemia: Cancer and Leukemia Group B study 9720. *Blood*. 2002;100(4):1224-1232.
4. Lee EJ, George SL, Caligiuri M, et al. Parallel phase I studies of daunorubicin given with cytarabine and etoposide with or without the multidrug resistance modulator PSC-833 in previously untreated patients 60 years of age or older with acute myeloid leukemia: results of Cancer and Leukemia Group B study 9420. *J Clin Oncol*. 1999;17(9):2831-2839.
5. Mayer RJ, Davis RB, Schiffer CA, et al. Intensive postremission chemotherapy in adults with acute myeloid leukemia. *N Engl J Med*. 1994;331(14):896-903.
6. Stone RM, Berg DT, George SL, et al. Postremission therapy in older patients with de novo acute myeloid leukemia: a randomized trial comparing mitoxantrone and intermediate-dose cytarabine with standard-dose cytarabine. *Blood*. 2001;98(3):548-553.
7. Marcucci G, Moser B, Blum W, et al. A phase III randomized trial of intensive induction and consolidation chemotherapy  $\pm$  oblimersen, a pro-apoptotic Bcl-2 antisense oligonucleotide in untreated acute myeloid leukemia patients  $>60$  years old [abstract]. *J Clin Oncol*. 2007;25(18S, suppl):360s. Abstract 7012.
8. Baer MR, George SL, Caligiuri MA, et al. Low-dose interleukin-2 immunotherapy does not improve outcome of patients age 60 years and older with acute myeloid leukemia in first complete remission: Cancer and Leukemia Group B study 9720. *J Clin Oncol*. 2008;26(30):4934-4939.
9. Bloomfield CD, Lawrence D, Byrd JC, et al. Frequency of prolonged remission duration after high-dose cytarabine intensification in acute myeloid leukemia varies by cytogenetic subtype. *Cancer Res*. 1998;58(18): 4173-4179.
10. Cheson BD, Cassileth PA, Head DR, et al. Report of the National Cancer Institute-sponsored workshop on definitions of diagnosis and response in acute myeloid leukemia. *J Clin Oncol*. 1990;8(5):813-819.
11. Westfall PH, Tobias RD, Rom D, Wolfinger RD, Hochberg Y. Multiple Comparisons and Multiple Tests Using the SAS System. Cary, NC: SAS Institute Inc; 1999.
12. Klein JP, Moeschberger MP. Survival Analysis: Techniques for Censored and Truncated Data. New York, NY: Springer-Verlag; 1997.
13. Irizarry RA, Bolstad BM, Collin F, et al. Summaries of Affymetrix GeneChip probe level data. *Nucleic Acids Res*. 2003;31(4):e15.
14. Rao YL, Lee Y, Jarjoura D, et al. A comparison of normalization techniques for microRNA microarray data. *Stat Appl Genet Mol Biol*. 2008;7(1):22.

## Participating institutions

The following Cancer and Leukemia Group B institutions, principal investigators, and cytogeneticists participated in this study:

Wake Forest University School of Medicine, Winston-Salem, NC: David D. Hurd, P. Nagesh Rao, Wendy L. Flejter and Mark J. Pettenati (grant no. CA03927); The Ohio State University Medical Center, Columbus, OH: Clara D. Bloomfield, Karl S. Theil, Diane Minka and Nyla A. Heerema (grant no. CA77658); University of Iowa Hospitals, Iowa City, IA: Daniel A. Vaena and Shivanand R. Patil (grant no. CA47642); North Shore–Long Island Jewish Health System, Manhasset, NY: Daniel R. Budman and Prasad R. K. Koduru (grant no. CA35279); Roswell Park Cancer Institute, Buffalo, NY: Ellis G. Levine and AnneMarie W. Block (grant no. CA02599); Duke University Medical Center, Durham, NC: Jeffrey Crawford, Sandra H. Bigner, Mazin B. Qumsiyeh, John Eyre and Barbara K. Goodman (grant no. CA47577); University of Chicago Medical Center, Chicago, IL: Hedy L. Kindler, Diane Roulston, Yanming Zhang and Michelle M. Le Beau (grant no. CA41287); Ft. Wayne Medical Oncology/Hematology, Ft. Wayne, IN: Sreenivasa Nattam and Patricia I. Bader; Minneapolis VA Medical Center, Minneapolis, MN: Vicki A. Morrison and Sugandhi A. Tharapel (grant no. CA47555); Dana Farber Cancer Institute, Boston, MA: Harold J. Burstein, Ramana Tantravahi, Leonard L. Atkins, Paola Dal Cin and Cynthia C. Morton (grant no. CA32291); University of North Carolina, Chapel Hill, NC: Thomas C. Shea and Kathleen W. Rao (grant no. CA47559); Washington University School of Medicine, St. Louis, MO: Nancy L. Bartlett, Michael S. Watson, Eric C. Crawford, Peining Li, and Jaime Garcia-Heras (grant no. CA77440); Weill Medical College of Cornell University, New York, NY: John Leonard and Ram S. Verma (grant no. CA07968); University of Maryland Cancer Center, Baltimore, MD: Martin J. Edelman, Joseph R. Testa, Maimon M. Cohen, Judith Stamberg, and Yi Ning (grant no. CA31983); Eastern Maine Medical Center, Bangor, ME: Harvey M. Segal and Laurent J. Beaugard (grant no. CA35406); Long Island Jewish Medical Center CCOP, Lake Success, NY: Kanti R. Rai and Prasad R. K. Koduru (grant no. CA11028); Mount Sinai School of Medicine, New York, NY: Lewis R. Silverman and Vesna Najfeld (grant no. CA04457); Rhode Island Hospital, Providence, RI: William Sikov and Teresita Padre-Mendoza, Hon Fong L. Mark and Shelly L. Kerman (grant no. CA08025); SUNY Upstate Medical University, Syracuse, NY: Stephen L. Graziano, Larry Gordon and Constance K. Stein (grant no. CA21060); Dartmouth Medical School, Lebanon, NH: Konstantin Dragnev, Doris H. Wurster-Hill and Thuluvancheri K. Mohandas (grant no. CA04326); Vermont Cancer Center, Burlington, VT: Steven M. Grunberg, Elizabeth F. Allen and Mary Tang (grant no. CA77406); University of Minnesota, Minneapolis, MN: Bruce A. Peterson, Diane C. Arthur and Betsy A. Hirsch (grant no. CA16450); University of Nebraska Medical Center, Omaha, NE: Anne Kessinger and Warren G. Sanger (grant no. CA77298); University of Massachusetts Medical Center, Worcester, MA: William V. Walsh and Vikram Jaswaney (grant no. CA37135); Massachusetts General Hospital, Boston, MA: Jeffrey W. Clark, Leonard L. Atkins, Paola Dal Cin and Cynthia C. Morton (grant no. CA 12449); McGill Department of Oncology, Montreal, Quebec: J. L. Hutchison and Jacqueline Emond (grant no. CA31809); University of Missouri/Ellis Fischel Cancer Center, Columbia, MO: Michael C. Perry and Tim H. Huang (grant no. CA12046); University of Puerto Rico School of Medicine, San Juan, PR: Eileen I. Pacheco, Leonard L. Atkins and Cynthia C. Morton; University of Illinois at Chicago: David J. Peace, Maureen M. McCorquodale and Kathleen E. Richkind (grant no. CA74811); University

of California at San Diego: Barbara A. Parker and Renée Bernstein (grant no. CA11789); Western Pennsylvania Hospital, Pittsburgh, PA: John Lister and Gerard R. Diggans; Walter Reed Army Medical Center, Washington, DC: Brendan M. Weiss and Rawatmal B. Surana (grant no. CA26806); University of Cincinnati Medical Center, Cincinnati, OH: Orlando J. Martelo and Ashok K. Srivastava (grant no. CA47515); Columbia-Presbyterian Medical Center, New York, NY: Rose R. Ellison and Dorothy Warburton (grant no. CA12011); Georgetown University Medical Center, Washington, DC: Minnetta C. Liu and Jeanne M. Meck (grant no. CA77597); SUNY Maimonides Medical Center, Brooklyn, NY: Sameer Rafla and Ram S. Verma (grant no. CA25119); Medical University of South Carolina, Charleston, SC: Mark R. Green and Dayna J. Wolff (grant no. CA03927); Christiana Care Health Services, Inc., Newark, DE: Stephen S. Grubbs and Digamber S. Borgaonkar (grant no. CA45418).

**Table S1. Multivariable Cox regression models for outcome in all patients**

| End point/variables in final models     | HR   | 95% CI    | P     |
|-----------------------------------------|------|-----------|-------|
| <b>Disease-free survival</b>            |      |           |       |
| <i>FLT3</i> -ITD*, positive vs negative | 2.10 | 1.36-2.23 | <.001 |
| <i>NPM1</i> , mutated vs wild-type      | 0.59 | 0.41-0.85 | .005  |
| WBC*, continuous, 50-unit increase      | 1.44 | 1.07-1.95 | .028  |
| Hemoglobin*, continuous                 | 1.27 | 1.01-1.60 | .045  |
| <b>Overall survival</b>                 |      |           |       |
| <i>FLT3</i> -ITD, positive vs negative  | 1.97 | 1.45-2.68 | <.001 |
| <i>NPM1</i> , mutated vs wild-type      | 0.54 | 0.40-0.73 | <.001 |

HR indicates hazard ratio; CI, confidence interval; DFS, disease-free survival; OS, overall survival; WBC, white blood count; *FLT3*-ITD, internal tandem duplication of the *FLT3* gene; and *NPM1*, nucleophosmin 1.

A hazard ratio greater than 1 (less than 1) corresponds to a higher (lower) risk for higher values of continuous variables and the first category listed of a dichotomous variable. Variables considered in the multivariable models were those significant at  $\alpha=.20$  from the univariable models. Variables considered in the models were as follows: for DFS, *FLT3*-ITD (positive vs negative), *NPM1* (mutated vs wild-type), *WT1* (mutated vs wild-type), hemoglobin, WBC and race (white vs nonwhite); for OS, *FLT3*-ITD (positive vs negative), *NPM1* (mutated vs wild-type), *WT1* (mutated vs wild-type), platelets, WBC, race (white vs nonwhite) and performance status (Grade 2, 3 or 4 vs Grade 0 or 1).

\* *FLT3*-ITD, WBC and hemoglobin did not meet the proportional hazards assumption for DFS. Initially, *FLT3*-ITD significantly increases the risk for relapse or death, but the strength of its impact seems to lessen after about 9 months; the HR for *FLT3*-ITD is provided at 6 months. Higher WBC is associated with worse DFS until about 5 months; the HR for WBC is provided at 3 months. Higher hemoglobin is associated with worse DFS until about 3 months; the HR for hemoglobin is provided at 2 months.

**Table S2. Comparisons of DFS and OS of older primary CN-AML patients according to *FLT3*-ITD allelic ratio**

| End point                       | High*<br>(n=36) | Low*<br>(n=36) | Wild-type*<br>(n=147) | <i>P</i> <sup>†</sup><br>High vs<br>low | <i>P</i> <sup>†</sup><br>High vs<br>wild-type | <i>P</i> <sup>†</sup><br>Low vs<br>wild-type |
|---------------------------------|-----------------|----------------|-----------------------|-----------------------------------------|-----------------------------------------------|----------------------------------------------|
| <b>Disease-free survival</b>    |                 |                |                       | .95                                     | .01                                           | .09                                          |
| Median, y                       | 0.4             | 0.5            | 1.0                   |                                         |                                               |                                              |
| Disease-free at 3 y, % (95% CI) | 10 (2-26)       | 11 (3-26)      | 18 (12-26)            |                                         |                                               |                                              |
| <b>Overall survival</b>         |                 |                |                       | .38                                     | <.001                                         | .04                                          |
| Median, y                       | 0.5             | 0.8            | 1.4                   |                                         |                                               |                                              |
| Alive at 3 y, % (95% CI)        | 14 (5-27)       | 14 (5-27)      | 23 (16-30)            |                                         |                                               |                                              |

\* High and low *FLT3*-ITD allelic ratios are based on the median (0.615) *FLT3*-ITD/WT allelic ratio; wild-type is *FLT3*-ITD/WT allelic ratio equal to zero.

<sup>†</sup> *P*-values for DFS and OS variables were from the log-rank test. These *P*-values were adjusted for multiple comparisons using the Sidak procedure (Westfall PH, Tobias RD, Rom D, Wolfinger RD, Hochberg Y. Multiple Comparisons and Multiple Tests Using the SAS System. Cary, NC: SAS Institute Inc; 1999).

Median follow-up was 3.8 years (range, 2.3-11.6) for patients alive.



**Table S3. Multivariable Cox regression models for outcome in patients age 60–69 years**

| End point/variables in final models     | HR   | 95% CI    | P     |
|-----------------------------------------|------|-----------|-------|
| <b>Disease-free survival</b>            |      |           |       |
| <i>FLT3</i> -ITD*, positive vs negative | 2.94 | 1.67-5.18 | <.001 |
| Hemoglobin*, continuous                 | 1.50 | 1.05-2.15 | .018  |
| <b>Overall survival</b>                 |      |           |       |
| <i>FLT3</i> -ITD, positive vs negative  | 2.79 | 1.85-4.20 | <.001 |
| <i>NPM1</i> , mutated vs wild-type      | 0.62 | 0.41-0.93 | .021  |

HR indicates hazard ratio; CI, confidence interval; DFS, disease-free survival; OS, overall survival; and *FLT3*-ITD, internal tandem duplication of the *FLT3* gene.

A hazard ratio greater than 1 (less than 1) corresponds to a higher (lower) risk for higher values of continuous variables and the first category listed of a dichotomous variable. Variables considered in the multivariable models were those significant at  $\alpha=.20$  from the univariable models. Variables considered in the models were as follows: for DFS, *FLT3*-ITD (positive vs negative), hemoglobin, and WBC; for OS, *FLT3*-ITD (positive vs negative) and *NPM1* (mutated vs wild-type).

\* *FLT3*-ITD and hemoglobin did not meet the proportional hazards assumption for DFS. Initially, *FLT3*-ITD significantly increases the risk for relapse or death, but the strength of its impact seems to lessen after about 9 months; the HR for *FLT3*-ITD is provided at 6 months. Higher hemoglobin is associated with worse DFS until about 3 months; the HR for hemoglobin is provided at 2 months.

**Table S5. Overrepresented biological processes in the *FLT3*-ITD-associated gene-expression signature**

| GO ID | GO Name                                                  | Percentage of members studied that appear in the <i>FLT3</i> -ITD signature | <i>P</i> |
|-------|----------------------------------------------------------|-----------------------------------------------------------------------------|----------|
| 48291 | isotype switching to IgG isotypes                        | 100.00                                                                      | 0.003    |
| 48302 | regulation of isotype switching to IgG isotypes          | 100.00                                                                      | 0.003    |
| 18196 | peptidyl-asparagine modification                         | 90.00                                                                       | <0.001   |
| 18279 | protein amino acid N-linked glycosylation via asparagine | 90.00                                                                       | <0.001   |
| 9081  | branched chain family amino acid metabolic process       | 81.82                                                                       | <0.001   |
| 9083  | branched chain family amino acid catabolic process       | 77.78                                                                       | 0.002    |
| 6778  | porphyrin metabolic process                              | 76.47                                                                       | <0.001   |
| 33013 | tetrapyrrole metabolic process                           | 76.47                                                                       | <0.001   |
| 42168 | heme metabolic process                                   | 73.33                                                                       | <0.001   |
| 6779  | porphyrin biosynthetic process                           | 71.43                                                                       | <0.001   |
| 33014 | tetrapyrrole biosynthetic process                        | 71.43                                                                       | <0.001   |
| 51187 | cofactor catabolic process                               | 71.43                                                                       | <0.001   |
| 9451  | RNA modification                                         | 69.23                                                                       | 0.001    |
| 6783  | heme biosynthetic process                                | 66.67                                                                       | 0.003    |
| 6099  | tricarboxylic acid cycle                                 | 66.67                                                                       | <0.001   |
| 9109  | coenzyme catabolic process                               | 66.67                                                                       | <0.001   |
| 46356 | acetyl-CoA catabolic process                             | 66.67                                                                       | <0.001   |
| 6084  | acetyl-CoA metabolic process                             | 62.50                                                                       | <0.001   |
| 42440 | pigment metabolic process                                | 61.54                                                                       | <0.001   |
| 9063  | amino acid catabolic process                             | 59.52                                                                       | <0.001   |
| 46483 | heterocycle metabolic process                            | 58.82                                                                       | <0.001   |
| 6487  | protein amino acid N-linked glycosylation                | 58.62                                                                       | 0.002    |
| 9310  | amine catabolic process                                  | 58.33                                                                       | <0.001   |
| 19748 | secondary metabolic process                              | 57.58                                                                       | <0.001   |
| 46148 | pigment biosynthetic process                             | 56.52                                                                       | 0.003    |
| 44270 | nitrogen compound catabolic process                      | 56.00                                                                       | <0.001   |
| 6096  | glycolysis                                               | 55.56                                                                       | <0.001   |
| 6007  | glucose catabolic process                                | 52.17                                                                       | <0.001   |
| 6418  | tRNA aminoacylation for protein translation              | 51.16                                                                       | <0.001   |
| 43038 | amino acid activation                                    | 51.16                                                                       | <0.001   |
| 43039 | tRNA aminoacylation                                      | 51.16                                                                       | <0.001   |
| 46164 | alcohol catabolic process                                | 50.00                                                                       | <0.001   |

Gray-shaded rows indicate GO terms involved in cellular metabolic processes.

**Table S6. *FLT3*-ITD-associated microRNA expression-signature derived from a comparison of *FLT3*-ITD versus *FLT3*-WT patients in older primary CN-AML, sorted by decreasing fold-change**

| Target microRNA <sup>†</sup>                      | Fold-change:<br><i>FLT3</i> -ITD/ <i>FLT3</i> -<br>WT | <i>P</i> |
|---------------------------------------------------|-------------------------------------------------------|----------|
| <b>Overexpressed in <i>FLT3</i>-ITD patients</b>  |                                                       |          |
| miR-155                                           | 2.81                                                  | < 1e-07  |
| miR-125b-2*                                       | 1.96                                                  | < 1e-07  |
| miR-146b-5p                                       | 1.60                                                  | 4.67E-05 |
| miR-378                                           | 1.52                                                  | 0.00023  |
| miR-136*                                          | 1.47                                                  | 0.00260  |
| miR-196a                                          | 1.46                                                  | 0.00082  |
| miR-135a                                          | 1.36                                                  | 0.00098  |
| miR-20a                                           | 1.35                                                  | 1.00E-07 |
| miR-196a*                                         | 1.34                                                  | 0.00389  |
| miR-16-2*                                         | 1.33                                                  | 3.01E-05 |
| miR-20b                                           | 1.30                                                  | 7.80E-06 |
| miR-106a <sup>‡</sup>                             | 1.28                                                  | 0.00019  |
| miR-92a                                           | 1.25                                                  | 0.00149  |
| miR-17                                            | 1.23                                                  | 0.00338  |
| miR-106a <sup>‡</sup>                             | 1.22                                                  | 0.00036  |
| miR-106b                                          | 1.21                                                  | 0.00055  |
| miR-19a                                           | 1.19                                                  | 0.00384  |
| <b>Underexpressed in <i>FLT3</i>-ITD patients</b> |                                                       |          |
| miR-107 <sup>‡</sup>                              | 0.79                                                  | 0.00080  |
| miR-107 <sup>‡</sup>                              | 0.79                                                  | 0.00028  |
| miR-103-as                                        | 0.78                                                  | 0.00014  |
| miR-185                                           | 0.77                                                  | 0.00154  |
| mir-640 (precursor)                               | 0.74                                                  | 0.00257  |
| mir-514 (precursor)                               | 0.70                                                  | 0.00175  |
| miR-342-3p                                        | 0.69                                                  | 0.00012  |
| mir-451 (precursor)                               | 0.68                                                  | 0.00154  |
| miR-512-5p                                        | 0.65                                                  | 0.00485  |
| miR-150                                           | 0.60                                                  | 6.79E-05 |
| miR-144                                           | 0.53                                                  | 0.00198  |
| miR-451                                           | 0.40                                                  | 9.00E-07 |
| miR-144*                                          | 0.36                                                  | 1.00E-06 |
| miR-488                                           | 0.36                                                  | 6.00E-06 |
| miR-486-5p                                        | 0.33                                                  | 1.40E-06 |

<sup>†</sup>Target microRNAs are annotated using standard nomenclature (Griffiths-Jones S. miRBase: microRNA sequences and annotation. *Curr Protoc Bioinformatics*. 2010, Chapter 12:Unit 12.9.1-10).

<sup>‡</sup>Target microRNA represented by two probes in the signature.

**Figure S1. Cumulative incidence of relapse (CIR) for patients with or without *FLT3*-ITD**

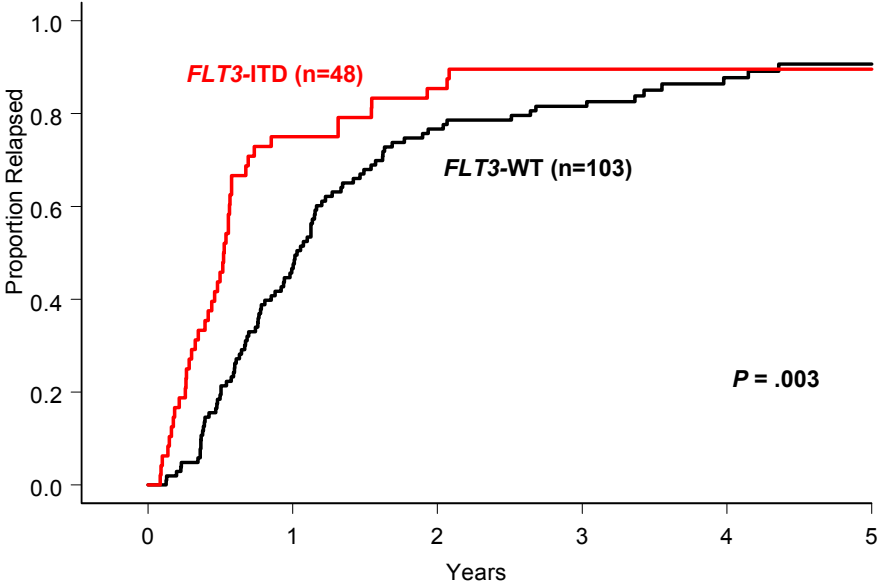

**Figure S2. Kaplan-Meier survival plots of older ( $\geq 60$  years) patients with cytogenetically normal, primary acute myeloid leukemia according to *FLT3*-ITD: wild-type (WT) allelic ratio**

(A) Disease-free and (B) overall survival.

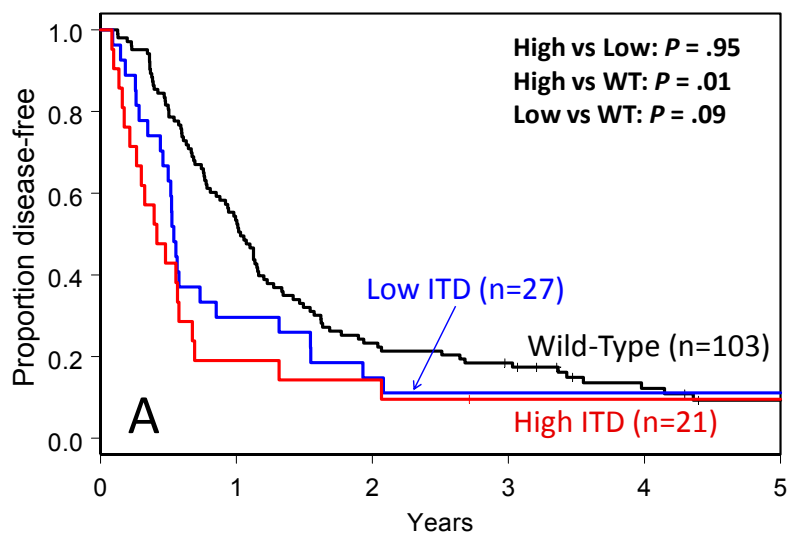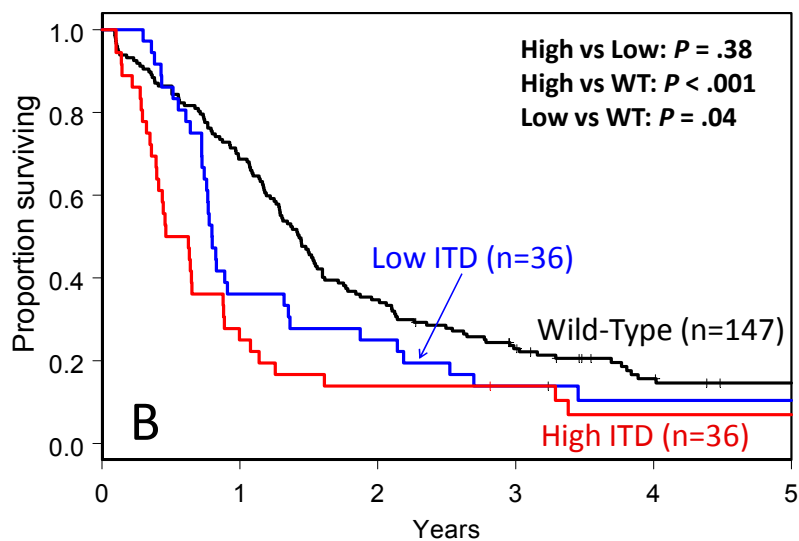

**Figure S3. Heat maps of the gene- and microRNA-expression signatures derived from a comparison of *FLT3*-ITD and *FLT3*-WT primary CN-AML patients  $\geq 60$  years of age**

Rows represent A) probe-sets or B) microRNA probes and columns represent patients. Patients are grouped by *FLT3*-ITD status and, within the *FLT3*-ITD group, ordered from left to right by increasing ITD/WT allelic ratio indicated by the triangle. Genes and microRNAs are ordered by hierarchical cluster analysis. The complete list of genes corresponding to each row is given in Table S4, Excel worksheet 2. Expression values of the probe-sets and microRNA probes are represented by color, with blue indicating expression less than and red indicating expression greater than the median value for the given probe-set or microRNA probe. Arrows indicate genes or microRNAs that are discussed in the text. Four microRNAs are listed in duplicate because they are represented by two distinct probes in the signature.

Figure S3A

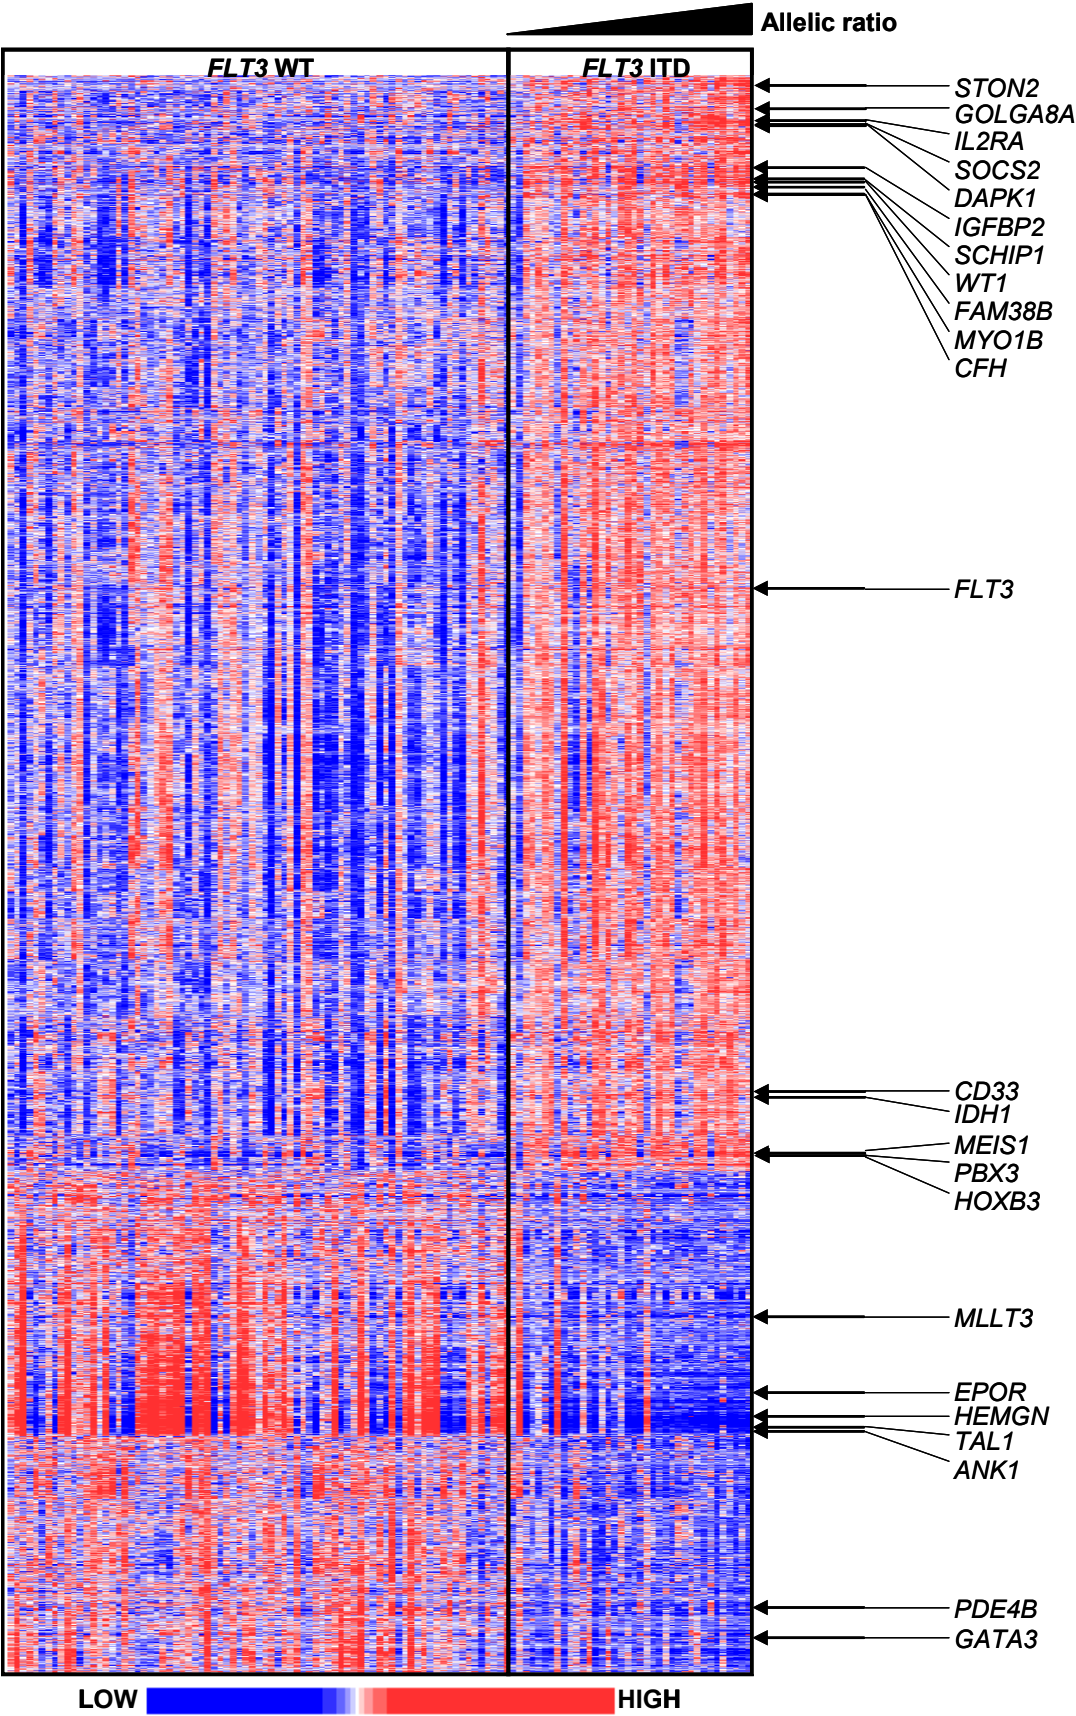

Figure S3B

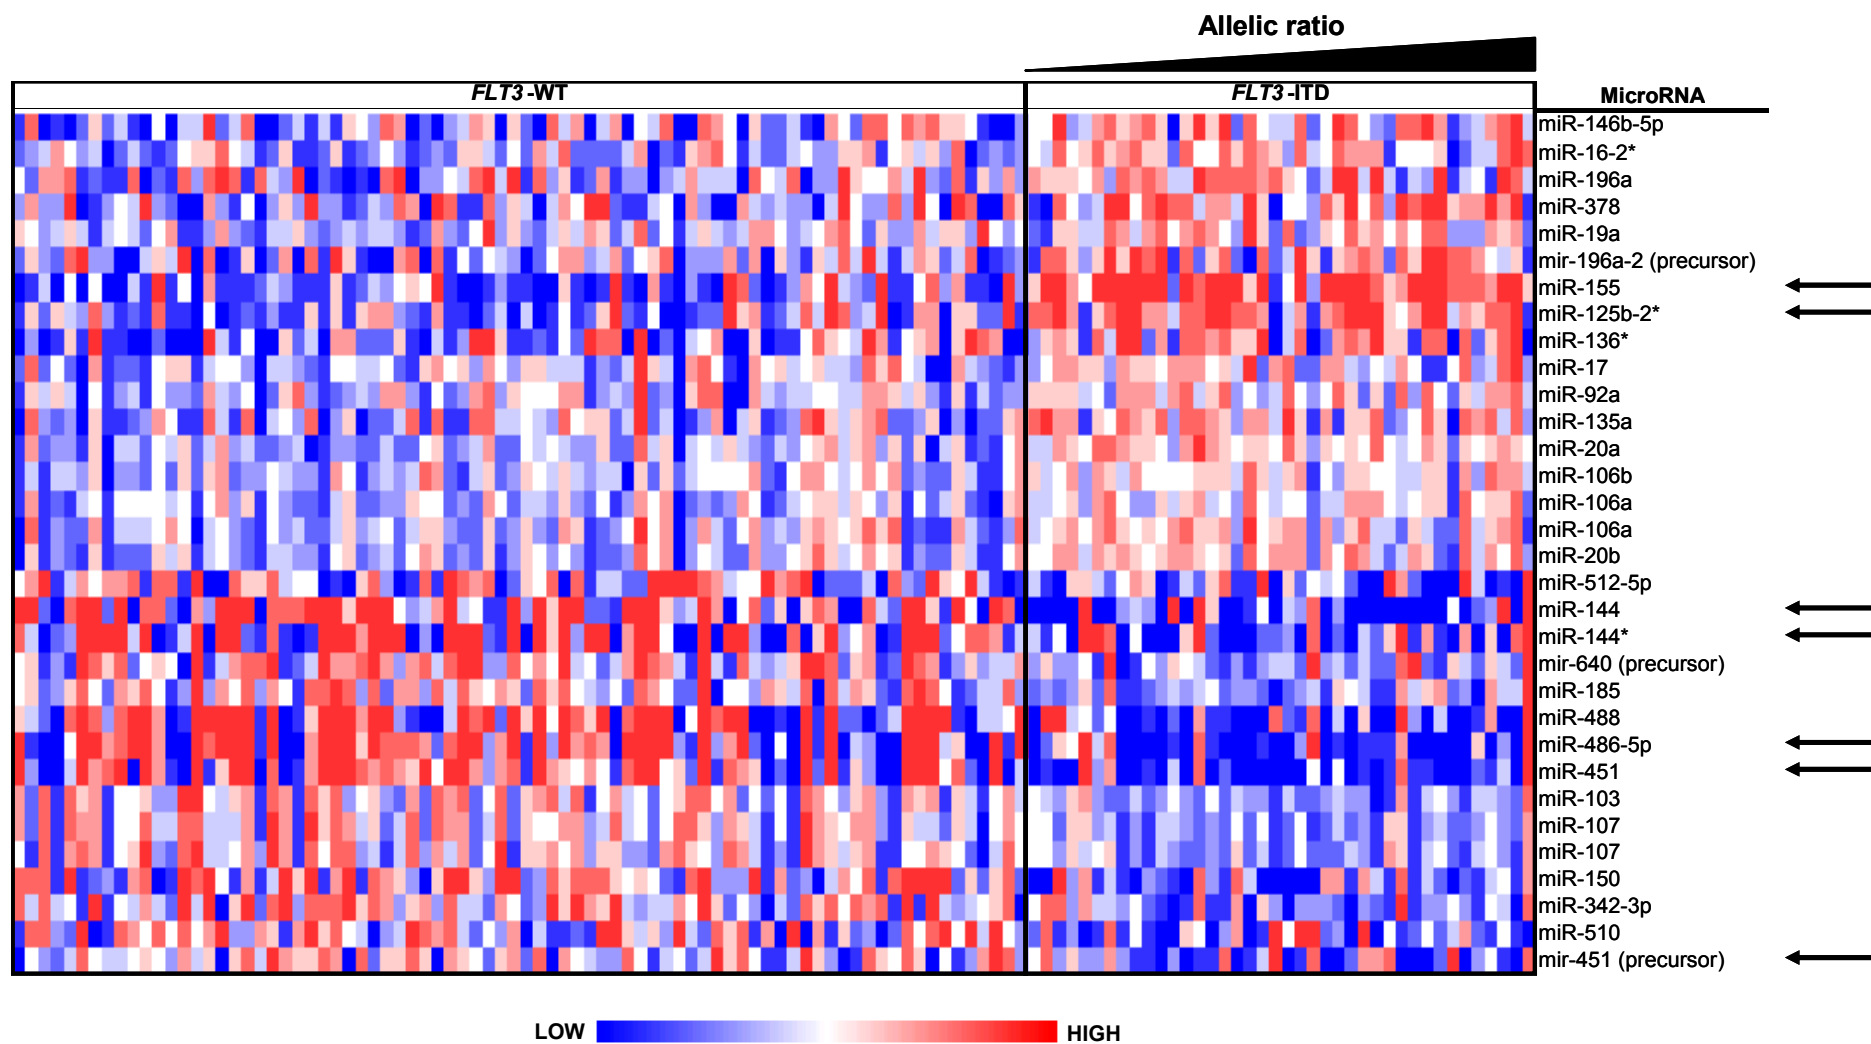

Supplement: blood-2010-05-283648_1.pdf [file blood-2010-05-283648_1.pdf]
